# Supplementary material for: Consulting people who use cannabis to plan a regulatory trial on non-medical cannabis sales in pharmacies
Source: Springer Nature journal article supplement (doi:10.1186/s40900-025-00791-3), 2025-10-24
Supplement: MOESM1 [file 40900_2025_791_MOESM1_ESM.pdf]

GRIPP2-Checklist Long Form

| Section and topic                               | Item                                                                                                  | Reported on page No |
|-------------------------------------------------|-------------------------------------------------------------------------------------------------------|---------------------|
| Section 1: Abstract of paper                    |                                                                                                       | 3                   |
| 1a: Aim                                         | Report the aim of the study                                                                           | 3                   |
| 1b: Methods                                     | Describe the methods used by which patients and the public were involved                              | 3                   |
| 1c: Results                                     | Report the impacts and outcomes of PPI in the study                                                   | 3                   |
| 1d: Conclusions                                 | Summarise the main conclusions of the study                                                           | 3                   |
| 1e: Keywords                                    | Include PPI, “patient and public involvement,” or alternative terms as keywords                       | 2                   |
| Section 2: Background to paper                  |                                                                                                       |                     |
| 2a: Definition                                  | Report the definition of PPI used in the study and how it links to comparable studies                 | 4-5                 |
| 2b: Theoretical underpinnings                   | Report the theoretical rationale and any theoretical influences relating to PPI in the study          | 4-5                 |
| 2c: Concepts and theory development             | Report any conceptual models or influences used in the study                                          | 4-5                 |
| Section 3: Aims of paper                        |                                                                                                       |                     |
| 3: Aim                                          | Report the aim of the study                                                                           | 7                   |
| Section 4: Methods of paper                     |                                                                                                       |                     |
| 4a: Design                                      | Provide a clear description of methods by which patients and the public were involved                 | 6-8                 |
| 4b: People involved                             | Provide a description of patients, carers, and the public involved with the PPI activity in the study | 9                   |
| 4c: Stages of involvement                       | Report on how PPI is used at different stages of the study                                            | 6-8                 |
| 4d: Level or nature of involvement              | Report the level or nature of PPI used at various stages of the study                                 | 6-8                 |
| Section 5: Capture or measurement of PPI impact |                                                                                                       |                     |
| 5a: Qualitative evidence of impact              | If applicable, report the methods used to qualitatively explore the impact of PPI in the study        | 7-8                 |
| 5b: Quantitative evidence of impact             | If applicable, report the methods used to quantitatively measure or assess the impact of PPI          | N/A                 |
| 5c: Robustness of measure                       | If applicable, report the rigour of the method used to capture or measure the impact of PPI           | N/A                 |
| Section 6: Economic assessment                  |                                                                                                       |                     |
| 6: Economic assessment                          | If applicable, report the method used for an economic assessment of PPI                               | N/A                 |
| Section 7: Study results                        |                                                                                                       |                     |
| 7a: Outcomes of PPI                             | Report the results of PPI in the study, including both positive and negative outcomes                 | 9-12                |

Advisory Group for SCRIPT – Schibli et al.

| Section and topic                         | Item                                                                                                                                                                                            | Reported on page No |
|-------------------------------------------|-------------------------------------------------------------------------------------------------------------------------------------------------------------------------------------------------|---------------------|
| 7b: Impacts of PPI                        | Report the positive and negative impacts that PPI has had on the research, the individuals involved (including patients and researchers), and wider impacts                                     | 9-12                |
| 7c: Context of PPI                        | Report the influence of any contextual factors that enabled or hindered the process or impact of PPI                                                                                            | 13                  |
| 7d: Process of PPI                        | Report the influence of any process factors, that enabled or hindered the impact of PPI                                                                                                         | 13-14               |
| 7ei: Theory development                   | Report any conceptual or theoretical development in PPI that have emerged                                                                                                                       | 14                  |
| 7eii: Theory development                  | Report evaluation of theoretical models, if any                                                                                                                                                 | 14                  |
| 7f: Measurement                           | If applicable, report all aspects of instrument development and testing (e.g., validity, reliability, feasibility, acceptability, responsiveness, interpretability, appropriateness, precision) | N/A                 |
| 7g: Economic assessment                   | Report any information on the costs or benefit of PPI                                                                                                                                           | N/A                 |
| Section 8: Discussion and conclusions     |                                                                                                                                                                                                 |                     |
| 8a: Outcomes                              | Comment on how PPI influenced the study overall. Describe positive and negative effects                                                                                                         | 12-13               |
| 8b: Impacts                               | Comment on the different impacts of PPI identified in this study and how they contribute to new knowledge                                                                                       | 12-13               |
| 8c: Definition                            | Comment on the definition of PPI used (reported in the Background section) and whether or not you would suggest any changes                                                                     | 13-15               |
| 8d: Theoretical underpinnings             | Comment on any way your study adds to the theoretical development of PPI                                                                                                                        | 14-15               |
| 8e: Context                               | Comment on how context factors influenced PPI in the study                                                                                                                                      | 13                  |
| 8f: Process                               | Comment on how process factors influenced PPI in the study                                                                                                                                      | 13-14               |
| 8g: Measurement and capture of PPI impact | If applicable, comment on how well PPI impact was evaluated or measured in the study                                                                                                            | N/A                 |
| 8h: Economic assessment                   | If applicable, discuss any aspects of the economic cost or benefit of PPI, particularly any suggestions for future economic modelling.                                                          | N/A                 |
| 8i: Reflections/critical perspective      | Comment critically on the study, reflecting on the things that went well and those that did not, so that others can learn from this study                                                       | 12-15               |
